# Supplementary material for: Pre-oxidization-induced change of physicochemical characteristics and removal behaviours in conventional drinking water treatment processes for polyethylene microplastics
Source: Royal Society of Chemistry journal article supplement (doi:10.1039/d0ra07953g), 2020-01-01
Supplement: d0ra07953g1.pdf [file d0ra07953g1.pdf]

*Supporting Information*  
(3 pages)

**Pre-oxidation-induced Change of Physicochemical Characteristics  
and Removal Behaviours in Conventional Drinking Water  
Treatment Processes for Polyethylene Microplastics**

Yu Shao <sup>a</sup>, Xinhong Zhou <sup>a</sup>, Xiaowei Liu <sup>a,b\*</sup>, and Lili Wang <sup>c</sup>

<sup>a</sup> Zhejiang Key Laboratory of Drinking Water Safety and Distribution Technology, College of Civil Engineering and Architecture, Zhejiang University, Hangzhou 310058, China. E-mail: liuxiaowei@zju.edu.cn

<sup>b</sup> Institute of Coastal and Offshore Engineering, Zhejiang University, Zhoushan 316000, China.

<sup>c</sup> Department of Biological and Environmental Engineering, Jiyang College of Zhejiang A & F University, Zhuji 311800, China. E-mail: lililiwang@zafu.edu.cn,

Corresponding author: Dr. Xiaowei Liu

Tel: +86-571-88206759; fax: +86-571-88208721; e-mail: liuxiaowei@zju.edu.cn.

The Journal: RSC Advances

Pages: 3, Text: 1, Figures: 2

**Text 1S.** The electron paramagnetic resonance (EPR) spin trapping experiments were performed using a Bruker A200 ESP 300E instrument at 300 K. The EPR spectrometer settings in the spin trapping experiments were: center field, 351.194 mT; sweep width, 10.00 mT; modulation amplitude, 0.1 mT; sweep time, 41 s; microwave frequency, 9.858 GHz; microwave power, 2.25 mW; receiver gain,  $1.42 \times 10^4$ . The sample of ozonation system was draw at the reaction time of 3 min, followed by DMPO addition ( $[\text{DMPO}]_0 = 12.5 \text{ mg/L}$ ) and subsequent filtration. The filtrated sample was absorbed in the capillaries before transferring into the EPR spin trapping apparatus.

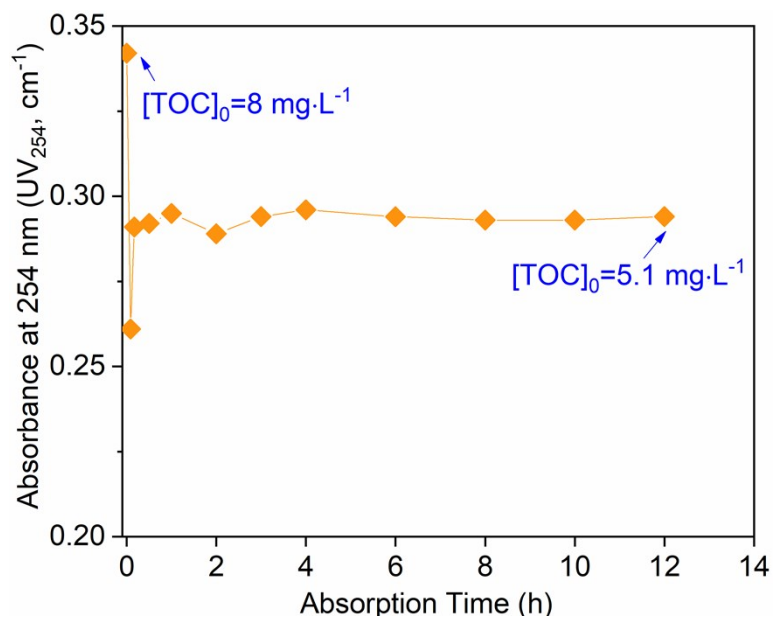

**Fig. 1S.** Evolution of  $UV_{254}$  for mixed solution of HA acid and PE MPs. (Experimental conditions:  $[HA]_0 = 8 \text{ mg}\cdot\text{L}^{-1}$ , PE MPs dose =  $32 \text{ mg}\cdot\text{L}^{-1}$ , 20 NTU turbidity,  $\text{pH}=7.0$ , ionic strength  $10 \text{ mM}$ ,  $25 \text{ }^\circ\text{C}$ )

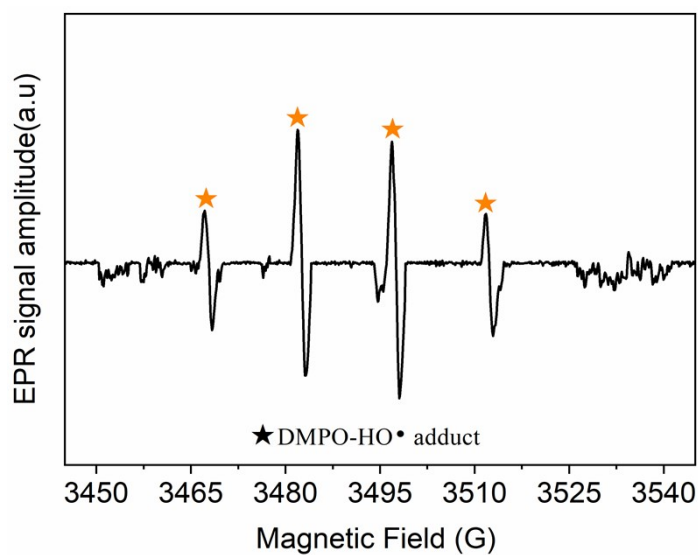

**Fig. 2S.** The EPR spectra of  $\text{DMPO-HO}\cdot$  sample collected from pre-ozonation system in the presence of DMPO. (Experimental conditions:  $[O_3]_0 = 2.0 \text{ mg}\cdot\text{L}^{-1}$ , NOM-preloading PE MPs dose =  $5 \text{ mg}\cdot\text{L}^{-1}$ ,  $\text{pH}=7.0$ , ionic strength  $10 \text{ mM}$ ,  $25 \text{ }^\circ\text{C}$ ,  $\text{pH} 7.0$ .)
